# Supplementary material for: Liposome biodistribution mapping with in vivo X-ray fluorescence imaging
Source: Royal Society of Chemistry journal article supplement (doi:10.1039/d4nr02793k), 2024-01-01
Supplement: d4nr02793k1.pdf [file d4nr02793k1.pdf]

## Supporting Information

### Liposome Biodistribution Mapping with *in vivo* X-ray Fluorescence Imaging

Giovanni M. Saladino, Po-Han Chao, Bertha Brodin, Shyh-Dar Li and Hans M. Hertz

\*Corresponding author. Email: saladino@kth.se

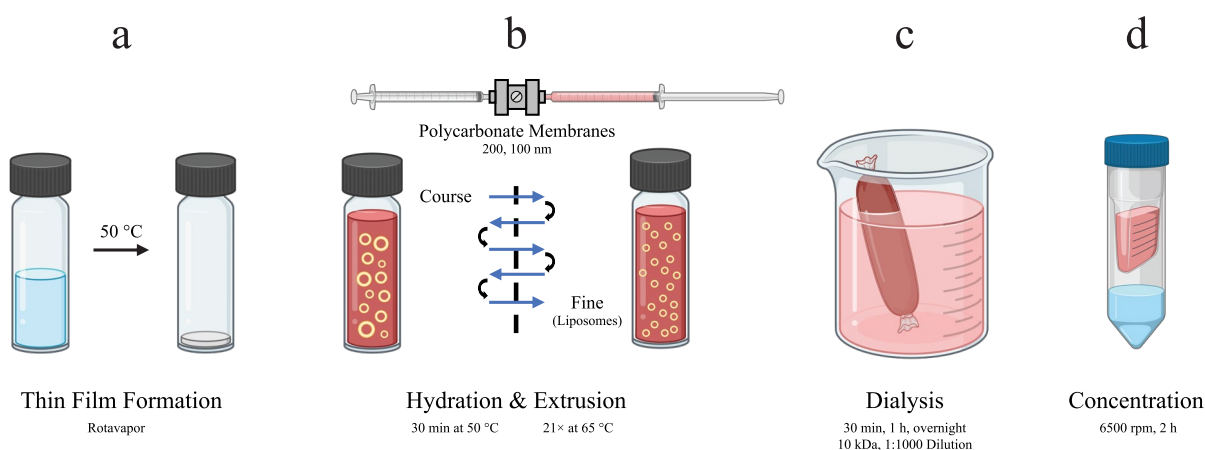

**Fig. S1.**

Synthesis Scheme. Ruthenium-encapsulated liposomes (Ru-Lipo) were synthesized with a thin-film hydration method. **(a)** A solution of lipids in chloroform was evaporated using a rotavapor at 50 °C, forming a thin film. **(b)** The film was hydrated with an aqueous solution of Ru(bpy)<sub>3</sub>, followed by subsequent extrusions with polycarbonate membrane, leading to the formation of uniform Ru-Lipo. **(c)** The sample was dialyzed multiple times and **(d)** concentrated with centrifuge filter units.

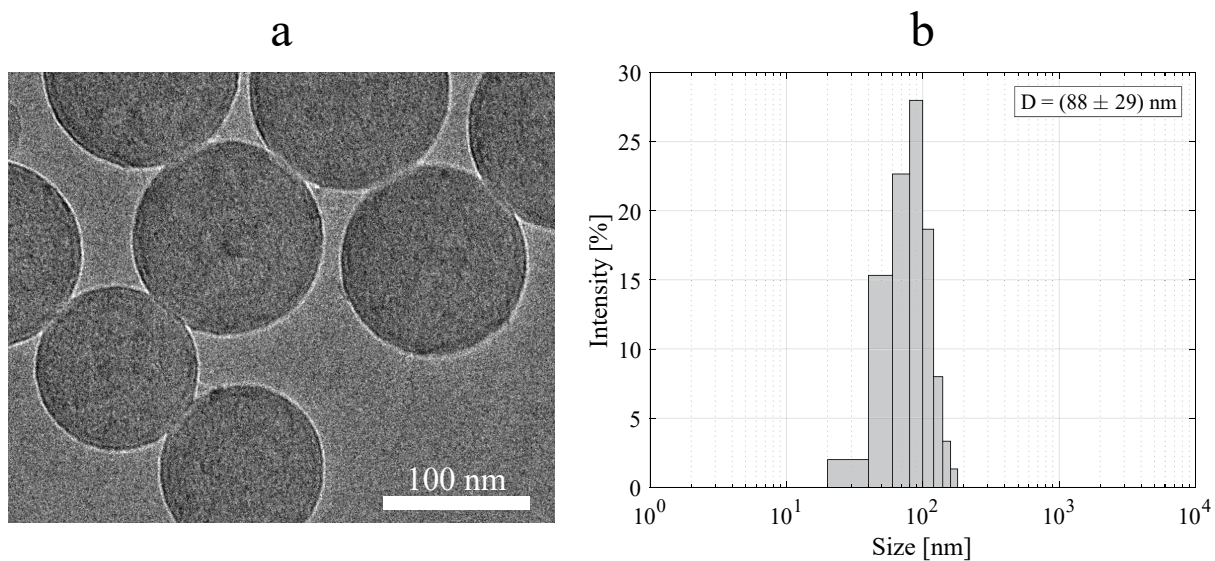

**Fig. S2.**

Morphological characterization. **(a)** High-resolution Cryo-TEM micrograph of ruthenium-encapsulated liposomes, Ru-Lipo, showing the lipid bilayer structure. Scale bar, 100 nm. **(b)** Size distribution histogram of Ru-Lipo obtained from the Cryo-TEM micrographs, leading to an estimated diameter of  $88 \pm 29$  nm.

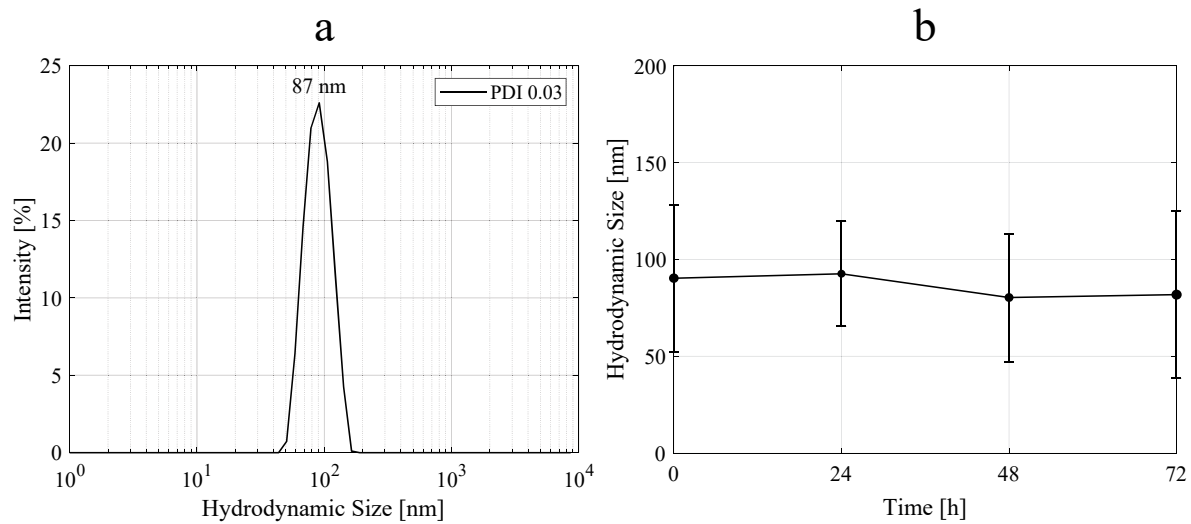

**Fig. S3.** Stability characterization. (a) Hydrodynamic size distribution of the ruthenium-encapsulated liposomes, Ru-Lipo and (b) longitudinal study in saline solution (0.9 %) at 37 °C ( $\pm$  SD).

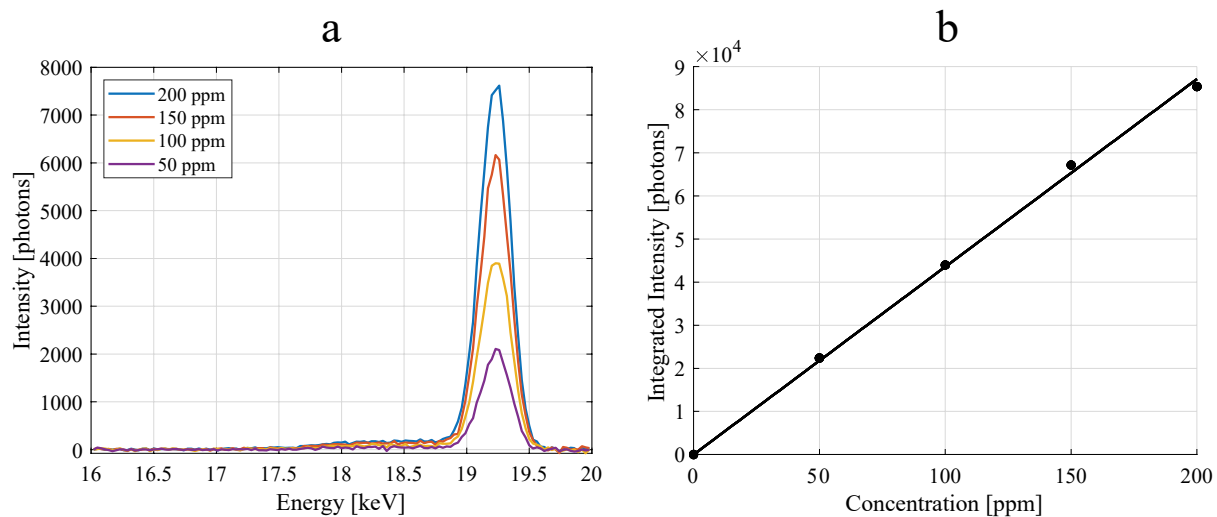

**Fig. S4.**

X-ray fluorescence (XRF) properties of Ru-Lipo. **(a)** XRF K $\alpha$  emission peaks as a function of Ru-Lipo's concentration, after background removal. **(b)** Calibration curve for XRF intensity as a function of the concentration of Ru standards.

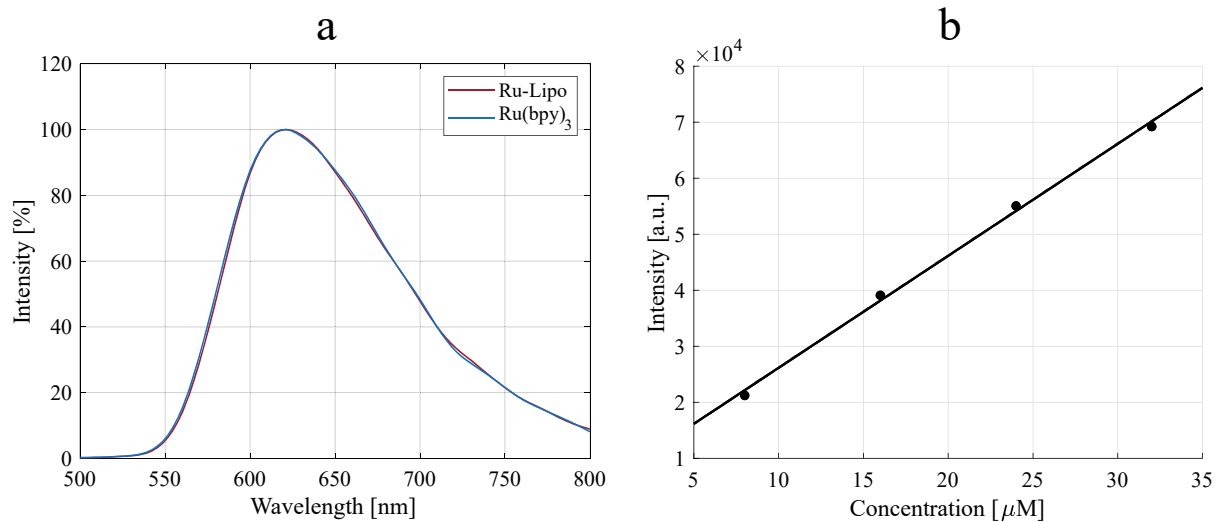

**Fig. S5.**

Optical fluorescence properties of Ru-Lipo. **(a)** Fluorescence emission spectra of Ru-Lipo (in red) and the free dye, Ru(bpy)<sub>3</sub> (in blue). **(b)** Calibration curve for optical fluorescence intensity as a function of the concentration of Ru(bpy)<sub>3</sub>.

**Table S1.** Ruthenium-encapsulated liposome (Ru-Lipo) properties. Estimated values for encapsulation efficiency (EE), Ru-to-Lipid ratio, Load-to-Lipid ratio, initial and effective lipid ratios (w/w).

| Encapsulation Efficiency (EE) | Ru-to-Lipid Ratio (w/w) | Load-to-Lipid Ratio (w/w) | Initial Lipid Ratio (DSPC:CH:DSPE-PEG) | Effective Lipid Ratio (DSPC:CH:DSPE-PEG) |
|-------------------------------|-------------------------|---------------------------|----------------------------------------|------------------------------------------|
| 10.00 %                       | 1.80 %                  | 13.2 %                    | 3:1:1                                  | 3:0.8:0.7                                |

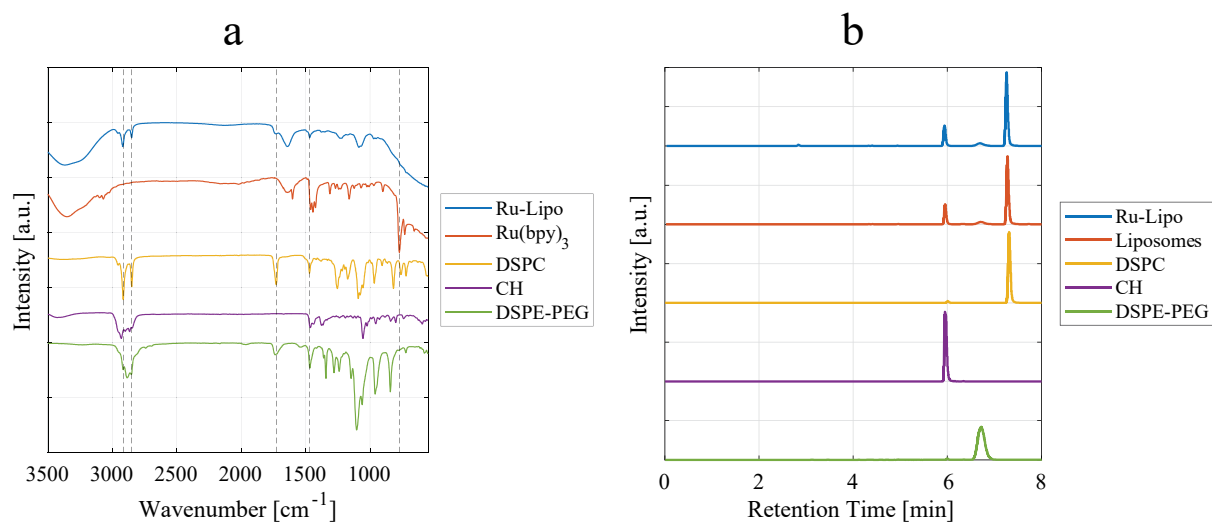

**Fig. S6.**

Structural characterization. **(a)** FT-IR spectra of Ru-Lipo (blue), Ru(bpy)<sub>3</sub> (orange), DSPC (yellow), CH (purple), and DSPE-PEG (green). **(b)** UPLC plots of diluted samples containing Ru-Lipo (blue), empty liposomes (orange), DSPC (yellow), CH (purple), and DSPE-PEG (green).

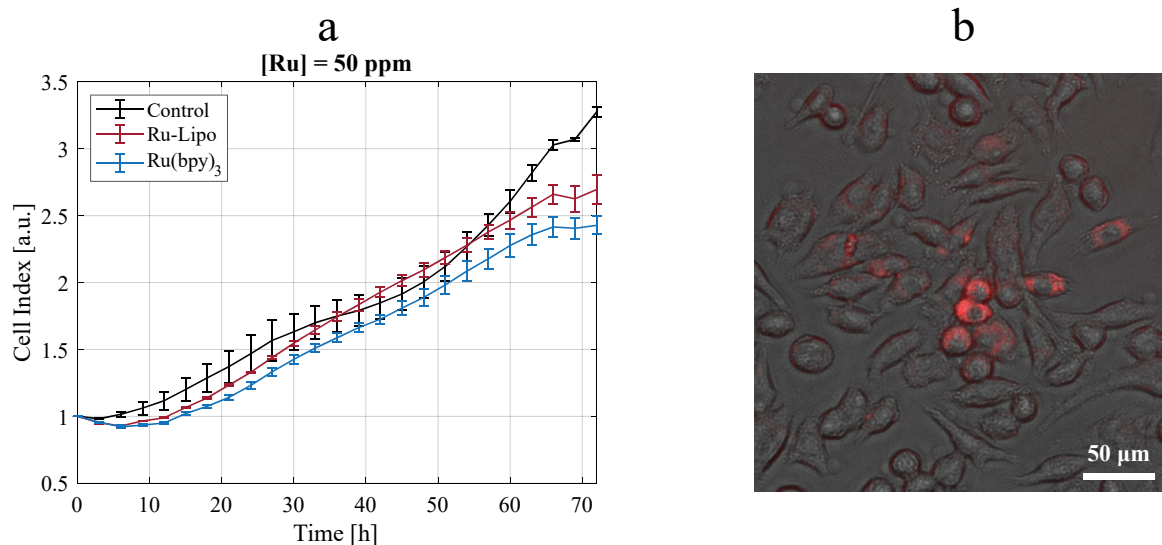

**Fig. S7.**

Cell studies. **(a)** Real-time cell analysis (RTCA) assay on macrophages (RAW 264.7), after exposure to ruthenium-encapsulated liposomes (Ru-Lipo, in red) and free ruthenium dye, Ru(bpy)<sub>3</sub> (in blue) with a ruthenium concentration of 50 ppm. The cell index values are compared to unexposed (negative) control cells (black). Measurements were made in triplicates ( $\pm$  SD). **(b)** Live images of RAW 264.7 macrophages incubated with Ru-Lipo ([Ru] = 50 ppm) for 1 h. Optical fluorescence signal from Ru-Lipo is shown in red. Trans-luminescence signal is included to highlight cell morphology. Scale bar, 50  $\mu$ m.



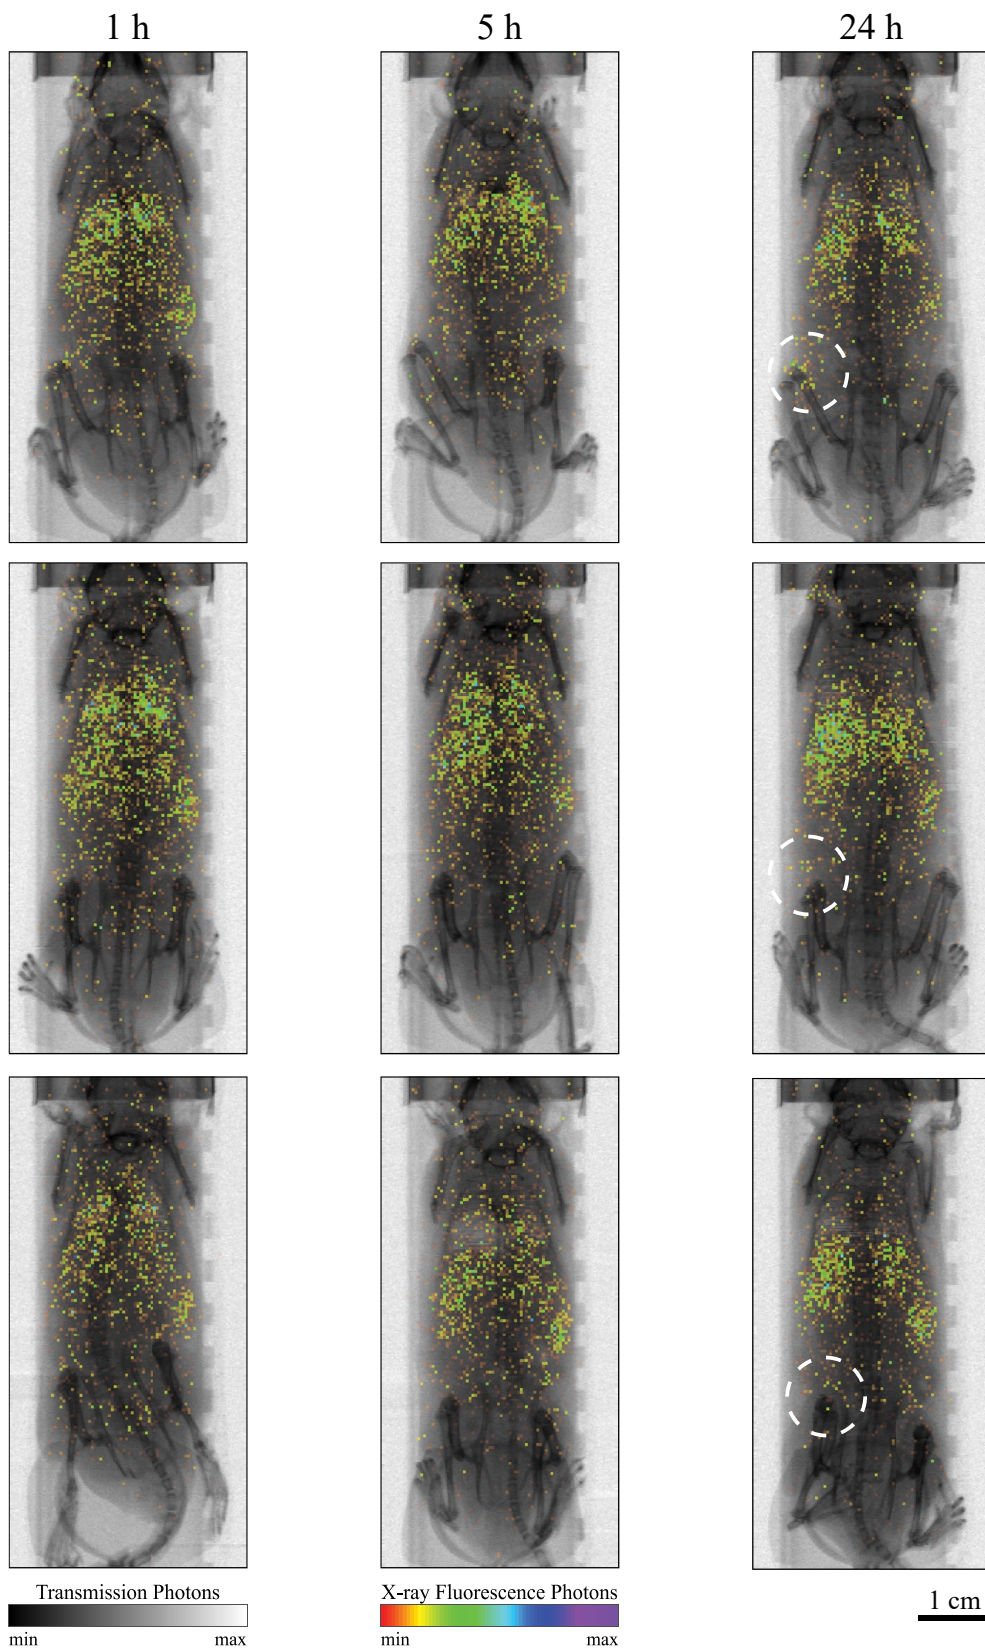

**Fig. S8.**

*In Vivo* X-ray Fluorescence Imaging. Mice injected with Ru-Lipo were imaged after 1 h, 5 h, and 24 h. X-ray fluorescence signal overlaid on transmitted photons. Tumor area is indicated with a dashed white circle. Scale bar, 1 cm.

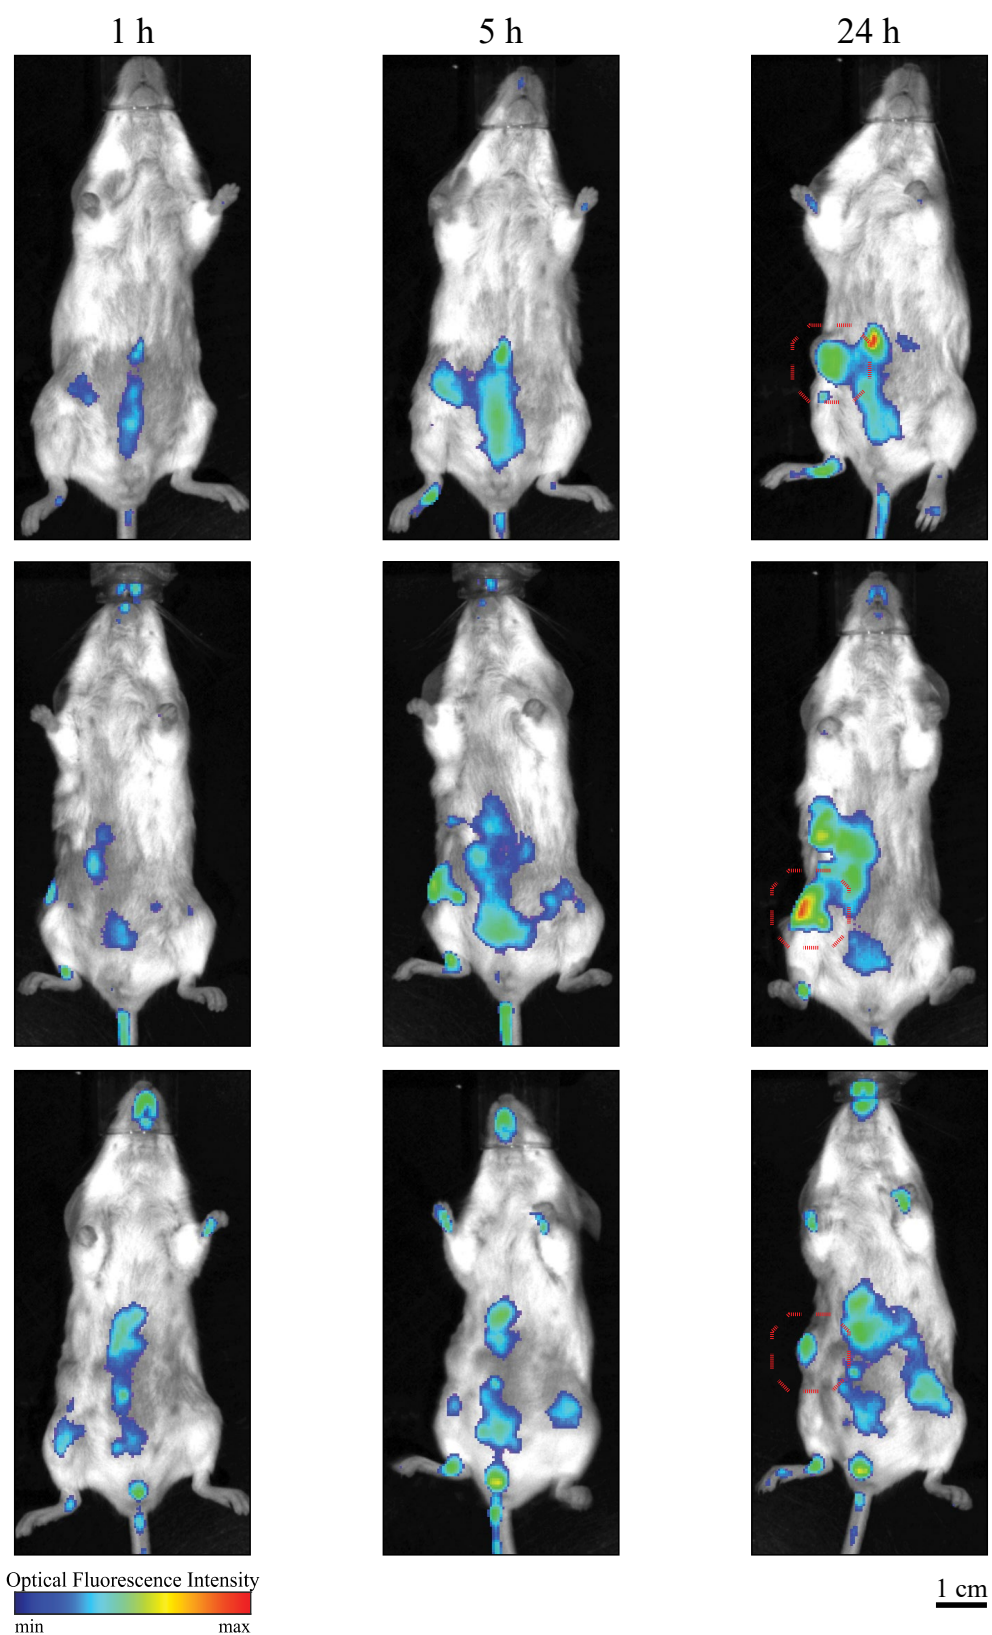

**Fig. S9.**

*In Vivo* Optical Fluorescence Imaging. Mice injected with Ru-Lipo were imaged after 1 h, 5 h, and 24 h. Optical fluorescence signal overlaid on photograph. Tumor area is indicated with a dashed red circle. Scale bar, 1 cm.
